# Supplementary material
Source: HighWire-hosted journal article supplement (https://www.rsfjournal.org/highwire/filestream/4251/field_highwire_adjunct_files/0/Maloney_Web_Appendix.docx)
Supplement: Maloney_Web_Appendix.docx [file Maloney_Web_Appendix.docx]

**Web Appendix**

**Appendix A: All Occupational Identities**

| **Identity** | **OSG** | **E** | **P** | **A** | **Def. Score** | **Avg SIOPS** | **Avg SEI** | **ISCO88** | **ISCO08** |
| --- | --- | --- | --- | --- | --- | --- | --- | --- | --- |
| accountant | DP | 1.03 | 1.16 | -0.48 | 5.36 | 41.23 | 59.91 | 4121, 4122, 2411 | 4311, 4313, 4312, 4312, 2411, 3339, 3352 |
| actor | ES | 0.82 | 1.36 | 1.68 | 5.27 | 61.78 | 66.70 | 2455 | 2654, 2655 |
| Advertising copy writer | DP | 0.65 | 0.55 | 0.66 | 4.39 | 41.00 | 51.77 | 4143 | 4413 |
| advertising executive | DP | 0.13 | 2.13 | 1.51 | 5.57 | NA | NA | NA | NA |
| airline pilot | ES | 1.66 | 2.41 | 0.33 | 6.98 | 66.00 | 73.71 | 3143 | 3153 |
| ambassador | ES | 1.46 | 2.28 | 0.31 | 6.11 | NA | NA | NA | NA |
| anesthetist | ES | 1.52 | 1.85 | -0.89 | 6.45 | NA | NA | NA | NA |
| architect | DP | 1.52 | 1.70 | -0.28 | 5.78 | 56.74 | 75.54 | 2141, 2149 | 2161, 1223, 2164, 2141, 3115, 2143 |
| artist | ES | 1.74 | 0.92 | -0.33 | 5.94 | 57.00 | 61.82 | 2452 | 2651 |
| assembly line worker | StS | 0.77 | -1.02 | 0.76 | 5.41 | 32.61 | 21.42 | 8282, 9321, 9322 | 8212, 8211, 9329, 9321 |
| assistant | ES | 1.51 | -0.10 | 0.05 | 5.45 | NA | NA | NA | NA |
| astronaut | StS | 2.33 | 2.13 | 0.76 | 8.22 | NA | NA | NA | NA |
| athlete | StS | 1.81 | 2.50 | 2.45 | 7.47 | 54.00 | 53.97 | 3475 | 3422, 3211 |
| attorney | ES | 1.21 | 2.46 | 1.51 | 6.22 | NA | NA | NA | NA |
| attorney general | DP | 0.94 | 2.54 | 0.73 | 5.88 | NA | NA | NA | NA |
| auctioneer | StS | 0.76 | 1.19 | 3.03 | 6.23 | 53.71 | 66.59 | 3417 | 3315, 2413 |
| auditor | DP | -0.33 | 1.54 | -0.61 | 4.36 | NA | NA | NA | NA |
| auditor general | DP | 0.14 | 1.55 | 0.10 | 4.52 | NA | NA | NA | NA |
| author | DP | 1.45 | 1.88 | -1.13 | 5.62 | NA | NA | NA | NA |
| auto mechanic | ES | 1.15 | 0.58 | 0.55 | 5.56 | 43.52 | 36.79 | 7232, 7231 | 7232, 7231, 7233, 7412 |
| automobile assembler | ES | 1.19 | 0.55 | 1.06 | 5.34 | NA | NA | NA | NA |
| baby sitter | ES | 2.12 | 1.36 | 0.36 | 6.31 | 23.00 | 24.98 | 5131 | 5311 |
| bailiff | DP | 0.72 | 1.56 | 0.10 | 5.34 | NA | NA | NA | NA |
| bailsman | DP | 0.58 | 1.57 | 0.55 | 4.21 | NA | NA | NA | NA |
| baker | ES | 1.97 | 0.70 | 0.06 | 6.09 | 33.00 | 23.57 | 7412 | 7512 |
| bank manager | DP | 1.11 | 1.81 | 0.27 | 5.49 | 51.14 | 70.96 | 1231 | 1211, 1219 |
| bank teller | DP | 1.27 | 0.57 | -0.52 | 5.16 | 51.56 | 67.13 | 3410, 4212 | 2413, 2412, 2411, 3339, 4211 |
| barber | ES | 1.35 | 0.26 | 0.41 | 4.92 | NA | NA | NA | NA |
| bartender | StS | 1.33 | 1.18 | 2.16 | 5.90 | NA | NA | NA | NA |
| beautician | StS | 1.32 | 0.05 | 1.11 | 5.94 | NA | NA | NA | NA |
| bellhop | StS | 1.20 | -0.82 | 0.95 | 5.80 | 23.13 | 25.06 | 9151 | 9621 |
| bill collector | DP | -1.07 | 1.63 | 1.02 | 4.89 | 27.00 | 50.05 | 4215 | 4214 |
| biologist | ES | 1.83 | 1.45 | -0.11 | 5.83 | 64.83 | 83.63 | 2211 | 2114, 2131 |
| blacksmith | ES | 1.22 | 1.26 | 0.95 | 5.53 | NA | NA | 7221 | NA |
| board director | DP | 1.04 | 2.59 | 1.09 | 6.24 | NA | NA | NA | NA |
| bodyguard | ES | 1.86 | 2.65 | 0.39 | 7.37 | NA | NA | NA | NA |
| bookie | DP | -0.62 | 0.85 | 0.08 | 4.94 | NA | NA | NA | NA |
| bookkeeper | DP | 1.35 | 0.04 | -1.44 | 5.24 | NA | NA | NA | NA |
| bouncer | DP | 0.55 | 2.30 | 0.63 | 5.42 | NA | NA | NA | NA |
| bricklayer | ES | 1.21 | 0.69 | 0.11 | 5.09 | 34.00 | 22.57 | 7122 | 7112 |
| broadcast news analyst | DP | 0.68 | 1.33 | 1.41 | 4.90 | NA | NA | NA | NA |
| building contractor | DP | 1.05 | 1.39 | 1.04 | 4.92 | NA | NA | NA | NA |
| bulldozer operator | DP | 0.44 | 1.17 | 1.38 | 5.02 | NA | NA | 8332, 8334, 8330 | 8342, 8344, NA |
| bus driver | ES | 1.31 | 0.17 | 0.05 | 5.16 | 32.00 | 26.85 | 8323 | 8331 |
| busboy | StS | 0.85 | -1.16 | 0.33 | 5.44 | NA | NA | NA | NA |
| butcher | DP | 0.75 | 0.77 | 0.67 | 4.86 | 23.79 | 20.95 | 7411 | 7511 |
| cabinet maker | DP | 1.10 | 0.71 | 0.28 | 4.48 | 30.50 | 27.09 | 7420, 7422 | 7317, 7522 |
| cabinet member | DP | 0.59 | 1.84 | 0.46 | 5.74 | NA | NA | NA | NA |
| carpenter | ES | 1.25 | 0.65 | 0.86 | 5.43 | NA | NA | 7124, 7331 | 7115, NA |
| cashier | ES | 0.65 | -0.73 | 0.42 | 4.62 | 32.16 | 30.90 | 4211 | 5230 |
| casual laborer | DP | 0.77 | -0.42 | -0.05 | 4.53 | NA | NA | NA | NA |
| cement worker | ES | 0.79 | 0.27 | 0.92 | 5.05 | 33.14 | 22.36 | 7123, 7132 | 7114, 7122 |
| ceo | StS | 0.71 | 3.22 | 1.48 | 7.57 | NA | NA | NA | NA |
| chairman of the board | DP | 1.05 | 3.04 | 0.96 | 6.08 | NA | NA | NA | NA |
| chairwoman | ES | 1.40 | 2.33 | 0.91 | 6.08 | NA | NA | NA | NA |
| chambermaid | ES | 0.50 | -1.52 | -0.84 | 5.46 | 22.00 | 16.50 | 5120 | 9412 |
| chaplain | ES | 2.12 | 1.58 | -0.52 | 6.59 | NA | NA | NA | NA |
| chauffeur | ES | 1.51 | -0.51 | -0.73 | 5.23 | NA | NA | NA | NA |
| cheerleader | AR | 1.05 | 0.24 | 2.93 | 7.52 | NA | NA | NA | NA |
| chef | StS | 1.69 | 1.35 | 1.68 | 6.87 | NA | NA | NA | NA |
| chemical engineer | ES | 1.57 | 1.73 | -0.41 | 6.25 | 66.00 | 82.31 | 2146 | 2145 |
| chemist | DP | 1.82 | 1.88 | -0.68 | 6.00 | 69.00 | 83.50 | 2113 | 2113 |
| chief operations officer | DP | 0.83 | 2.45 | 1.15 | 5.71 | NA | NA | NA | NA |
| chiropractor | ES | 1.77 | 1.38 | -0.36 | 5.75 | NA | NA | NA | NA |
| choreographer | StS | 1.27 | 1.21 | 1.97 | 5.94 | NA | NA | NA | NA |
| church deacon | ES | 1.41 | 1.40 | -0.17 | 6.12 | 39.00 | 54.54 | 3480 | 3413 |
| city councilor | DP | 0.66 | 1.80 | 0.70 | 4.91 | NA | NA | NA | NA |
| civil engineer | ES | 1.70 | 1.55 | -0.02 | 6.22 | 70.00 | 81.40 | 2142 | 2142 |
| civil servant | StS | 1.18 | -0.17 | -0.54 | 6.18 | NA | NA | 3442, 3443, 3444 | 2411, 3353, NA |
| cleaning woman | ES | 1.82 | 0.16 | -0.05 | 5.56 | NA | NA | NA | NA |
| clergy | DP | 1.08 | 1.44 | -0.73 | 5.24 | 54.00 | 71.55 | 2460 | 2636 |
| clerical worker | DP | 1.11 | -0.09 | -0.47 | 4.68 | 45.00 | 40.56 | 4113 | 4132 |
| clerk | DP | 0.98 | -0.40 | -0.09 | 4.51 | 38.93 | 40.51 | 4110, 4100, 4132, 4133 | 4110, 4419, 4225, 4322, 5419 |
| coach | StS | 1.96 | 2.37 | 2.19 | 7.73 | NA | NA | NA | NA |
| coal miner | ES | 0.84 | 0.11 | 0.54 | 5.17 | NA | NA | 7110 | NA |
| comedian | AR | 1.94 | 1.19 | 2.88 | 7.65 | NA | NA | NA | NA |
| commentator | ES | 0.89 | 0.92 | 1.86 | 5.34 | NA | NA | NA | NA |
| commissioner | DP | 0.99 | 1.88 | 0.59 | 5.00 | NA | NA | NA | NA |
| computer programmer | ES | 1.51 | 1.46 | 0.01 | 5.78 | 52.56 | 75.55 | 2131 | 2514, 2512, 2529, 2152, 2511, 2521, 2522, 2523, 2513 |
| computer security specialist | DP | 1.57 | 1.45 | -0.59 | 5.50 | NA | NA | NA | NA |
| computer support specialist | ES | 1.33 | 0.82 | -0.02 | 5.85 | 48.72 | 56.72 | 3121, 2132, 3122 | 3512, 2511, 3511, 7223 |
| construction contractor | ES | 1.37 | 1.38 | 1.35 | 5.32 | NA | NA | NA | NA |
| construction foreman | ES | 1.13 | 1.47 | 1.42 | 5.81 | NA | NA | NA | NA |
| construction laborer | ES | 1.33 | 0.68 | 1.59 | 5.26 | 24.25 | 19.69 | 7141, 9312, 7129, 7133, 9313 | 7131, 9313, 9312, 7123, 9622, 9313, 7119, 7123, 9313 |
| consultant | ES | 1.53 | 1.61 | 0.77 | 5.92 | NA | NA | NA | NA |
| cook | StS | 2.24 | 1.69 | 1.58 | 7.30 | 30.33 | 30.39 | 5122 | 5120, 9412, 3434 |
| coroner | DP | 0.64 | 0.69 | -0.95 | 4.44 | NA | NA | NA | NA |
| cosmetologist | ES | 1.31 | 0.30 | 0.60 | 5.38 | NA | NA | NA | NA |
| counselor | StS | 2.54 | 1.66 | -0.78 | 7.96 | NA | NA | NA | NA |
| cpa | DP | 0.88 | 1.48 | -0.50 | 4.98 | NA | NA | NA | NA |
| craftsman | ES | 1.59 | 1.07 | -0.31 | 5.78 | NA | NA | 7324, 7341, 7520 | 8122, 7321, NA |
| crane operator | DP | 0.94 | 1.23 | 0.29 | 4.74 | 28.70 | 24.48 | 8333 | 8343, 8189 |
| creditor | DP | -0.45 | 1.63 | 0.63 | 5.21 | NA | NA | NA | NA |
| custodian | ES | 1.54 | -0.82 | -0.93 | 5.62 | 29.62 | 35.26 | 7143 | 9129, 7544 |
| customer systems analyst | DP | 0.90 | 0.33 | -0.60 | 5.22 | NA | NA | NA | NA |
| customs officer | DP | 0.45 | 1.37 | 0.13 | 4.36 | NA | NA | NA | NA |
| dairy farmer | ES | 1.62 | 0.42 | -0.62 | 5.49 | NA | NA | NA | NA |
| decorator | StS | 1.70 | 0.81 | 0.84 | 5.76 | 38.00 | 57.64 | 3471 | 3432 |
| defense attorney | DP | 0.86 | 2.05 | 1.44 | 5.64 | NA | NA | NA | NA |
| dental assistant | ES | 1.40 | 0.00 | 0.05 | 5.34 | 49.87 | 47.83 | 3225 | 3251 |
| dental hygienist | ES | 1.68 | 0.86 | 0.34 | 5.70 | NA | NA | NA | NA |
| dentist | ES | 1.62 | 1.51 | 0.08 | 5.76 | 70.00 | 88.31 | 2222 | 2261 |
| deputy | DP | 1.08 | 2.00 | 0.80 | 5.25 | NA | NA | NA | NA |
| detective | ES | 1.65 | 1.93 | -0.80 | 6.48 | 54.41 | 60.02 | 3450 | 3411, 3355 |
| dietitian | ES | 1.56 | 0.90 | -0.32 | 5.14 | NA | NA | NA | NA |
| diplomat | ES | 1.20 | 2.21 | 0.80 | 6.39 | NA | NA | NA | NA |
| district attorney | DP | 0.80 | 2.38 | 1.16 | 5.99 | NA | NA | NA | NA |
| divorce lawyer | DP | -0.33 | 1.96 | 0.81 | 5.22 | NA | NA | NA | NA |
| doctor | AR | 2.69 | 2.94 | 0.37 | 9.38 | 63.94 | 67.53 | 2229, 2221 | 3258, 2212 |
| economist | DP | 0.87 | 0.93 | -0.26 | 4.83 | 60.00 | 80.92 | 2441 | 2631 |
| editor | DP | 1.08 | 1.70 | 0.23 | 5.39 | NA | NA | NA | NA |
| education administrator | ES | 1.43 | 2.09 | 0.56 | 5.92 | NA | NA | NA | NA |
| educator | StS | 2.42 | 2.52 | 0.26 | 8.36 | NA | NA | NA | NA |
| electrical engineer | ES | 1.71 | 1.61 | 0.28 | 5.76 | 65.00 | 80.78 | 2143 | 2151 |
| electrical linesman | DP | 1.01 | 0.64 | 0.34 | 4.57 | 36.33 | 37.76 | 7241, 7245 | 7412, 7422, 7413 |
| electrician | DP | 1.26 | 0.43 | -0.11 | 4.72 | 38.09 | 32.84 | 7137, 7240 | 7411, 7127, 7412 |
| elementary school teacher | AR | 2.66 | 1.81 | 0.71 | 8.79 | 53.00 | 67.63 | 2332, 2331 | 2342, 2341 |
| engineer | ES | 1.75 | 1.94 | 0.30 | 6.38 | 63.58 | 78.20 | 2144, 2147 | 2144, 2146 |
| entrepreneur | StS | 1.59 | 2.00 | 1.99 | 6.84 | NA | NA | NA | NA |
| environmentalist | StS | 2.10 | 0.65 | 0.77 | 6.70 | NA | NA | NA | NA |
| executive | DP | 0.82 | 2.73 | 1.50 | 6.10 | 64.51 | 70.34 | 1210 | 1120 |
| farm laborer | ES | 1.47 | -0.01 | -0.20 | 5.79 | 21.00 | 11.74 | 9211 | 9211 |
| farmer | ES | 2.13 | 0.50 | -0.48 | 6.26 | NA | NA | 6129, 6132, 6133 | 5164, NA, NA |
| fast food server | StS | 0.67 | -1.05 | 0.90 | 5.42 | NA | NA | NA | NA |
| file clerk | DP | 0.58 | -0.67 | -1.05 | 4.52 | 41.47 | 47.22 | 4190 | 2423, 4227, 4416, 4229 |
| film star | DP | 0.48 | 1.77 | 1.76 | 5.10 | NA | NA | NA | NA |
| fire investigator | ES | 1.95 | 1.66 | 0.43 | 6.11 | 56.36 | 57.88 | 3151 | 3151, 3112 |
| firefighter | AR | 3.27 | 2.85 | 2.29 | 10.09 | 35.00 | 46.38 | 5161 | 5411 |
| fisherman | ES | 1.47 | 0.41 | -0.87 | 5.90 | NA | NA | NA | NA |
| flight attendant | ES | 1.51 | 0.44 | 0.31 | 5.51 | 50.00 | 46.76 | 5111 | 5111 |
| foreman | DP | 0.64 | 1.30 | 0.34 | 4.17 | NA | NA | NA | NA |
| forest ranger | ES | 2.01 | 0.96 | -0.22 | 5.97 | 43.53 | 11.56 | 1311 | 6111 |
| fundraiser | AR | 2.55 | 2.18 | 1.40 | 8.52 | NA | NA | NA | NA |
| funeral director | DP | 0.80 | 0.57 | -1.36 | 4.90 | NA | NA | NA | NA |
| garbage collector | StS | 1.25 | -0.49 | 0.42 | 5.97 | 16.54 | 19.23 | 9160, 9161 | 9600, 9611 |
| gas station attendant | ES | 0.74 | -1.05 | -0.44 | 4.71 | NA | NA | NA | NA |
| geologist | DP | 1.34 | 0.49 | -1.01 | 5.08 | NA | NA | 2114 | NA |
| governor | DP | 0.57 | 2.20 | 0.76 | 5.11 | NA | NA | 1120 | NA |
| hairdresser | StS | 1.56 | -0.01 | 1.01 | 5.49 | 29.97 | 29.91 | 5141 | 5141, 5100, 5142 |
| hairstylist | StS | 1.62 | 0.39 | 0.71 | 5.83 | NA | NA | NA | NA |
| handyman | ES | 1.76 | 1.04 | 0.46 | 5.55 | 37.03 | 25.20 | 9141 | 5151 |
| host | StS | 2.08 | 1.62 | 1.26 | 7.10 | NA | NA | NA | NA |
| hostess | StS | 1.94 | 0.39 | 0.92 | 6.15 | NA | NA | NA | NA |
| housekeeper | ES | 1.40 | -0.74 | -0.53 | 5.57 | NA | NA | 5121, 9131 | NA, 9111 |
| immigration officer | DP | 0.14 | 1.63 | 0.72 | 4.98 | NA | NA | NA | NA |
| inspector | DP | 0.57 | 1.54 | -0.67 | 4.90 | 40.27 | 44.85 | 3152 | 7543, 3257, 7515 |
| instructor | ES | 1.74 | 2.11 | 0.56 | 6.01 | NA | NA | NA | NA |
| insurance agent | DP | 0.52 | 0.68 | 0.24 | 4.14 | 46.00 | 60.29 | 3412 | 3321 |
| insurance claims investigator | DP | 0.07 | 1.22 | -0.06 | 4.12 | NA | NA | NA | NA |
| intern | StS | 1.41 | -1.39 | 0.05 | 6.31 | NA | NA | NA | NA |
| interpreter | StS | 2.26 | 1.97 | 0.80 | 6.80 | 65.66 | 80.92 | 2444 | 2643 |
| interrogator | DP | -0.40 | 2.05 | 1.09 | 5.01 | NA | NA | NA | NA |
| interviewer | DP | 0.57 | 1.71 | 0.78 | 5.05 | NA | NA | NA | NA |
| investigator | ES | 1.67 | 2.01 | -0.04 | 6.32 | NA | NA | NA | NA |
| janitor | ES | 1.45 | -0.87 | -0.94 | 5.26 | 21.00 | 15.36 | 9132, 9140 | 9412, 9112 |
| jeweler | DP | 0.85 | 0.65 | -0.64 | 4.18 | 43.00 | 28.12 | 7313 | 7313 |
| journalist | ES | 0.85 | 1.55 | 1.02 | 5.44 | 59.95 | 72.83 | 2451 | 2641, 2642 |
| judge | DP | 1.15 | 2.53 | -0.22 | 6.40 | 76.11 | 88.96 | 2422 | 2612 |
| labor union leader | ES | 0.85 | 2.14 | 1.92 | 5.71 | NA | NA | NA | NA |
| laborer | ES | 1.02 | -0.11 | 0.32 | 5.04 | NA | NA | 9213, 7234, 9300, 9320, 9333 | 6222, NA, NA, 9329, 9329, 9333, 8344, 9330 |
| landscape architect | ES | 1.59 | 1.14 | -0.39 | 5.79 | NA | NA | NA | NA |
| landscaper | ES | 1.29 | 0.15 | 0.28 | 5.24 | 43.79 | 37.14 | 6113 | 9214, 6113, 1112 |
| lawyer | ES | 0.83 | 2.63 | 1.75 | 6.27 | 73.10 | 86.72 | 2421 | 2611 |
| lecturer | ES | 1.29 | 1.70 | 0.39 | 6.04 | NA | NA | NA | NA |
| legislator | DP | -0.07 | 2.18 | 0.31 | 5.36 | NA | NA | 110, 1110 | NA, 1111 |
| librarian | ES | 1.83 | -0.28 | -2.06 | 6.85 | 48.47 | 60.76 | 2431, 2432 | 2621, 2622, 4411, 3252 |
| library assistant | ES | 1.78 | -0.06 | -2.02 | 6.34 | 33.50 | 42.30 | 4141 | 4415, 4411 |
| lobby attendant | ES | 1.29 | -0.40 | -0.13 | 4.94 | NA | NA | NA | NA |
| lobbyist | ES | 0.01 | 1.53 | 1.67 | 5.48 | NA | NA | NA | NA |
| locksmith | DP | 1.16 | 0.81 | -0.27 | 4.72 | NA | NA | NA | NA |
| logger | DP | 0.70 | 1.18 | 0.83 | 4.90 | 42.00 | 12.01 | 6141 | 9215 |
| machine operator in a factory | ES | 0.94 | 0.29 | 1.10 | 5.25 | 32.43 | 26.79 | 7200, 7223, 8100, 8113, 8123, 8141, 8151, 8155, 8161, 8162, 8200, 8221, 8224, 8230, 8231, 8232, 8253, 8261 | 8219, 7223, 8122, 7223, 8141, 8181, 3130, 8113, 7224, 8172, 7523, 8112, 3134, 3131, 8182, 9329, 7223, 8132, 7211, 8141, 7223, 8171, 8151, 8181 |
| machine repairer | ES | 1.36 | 1.02 | 0.68 | 5.21 | 37.80 | 30.53 | 7230, 7233 | 7233, 7231, 9622, 7233 |
| magician | ES | 1.13 | 0.78 | 1.83 | 5.48 | NA | NA | NA | NA |
| maid | ES | 1.47 | -1.00 | -0.73 | 5.50 | NA | NA | NA | NA |
| mail carrier | StS | 1.93 | 0.02 | -0.44 | 6.19 | 30.05 | 27.52 | 4142 | 4412 |
| manager | DP | 1.15 | 2.61 | 1.29 | 6.02 | 54.61 | 57.75 | 1220, 1221, 1223, 1225, 1226, 1227, 1234, 1235, 1236, 1239, 1229, 1232, 1233 | 1321, 1120, 1311, 3123, 5120, 1412, 1324, 3341, 1222, 1219, 1324, 1330, 1344, 3353, 1431, 1345, 1342, 1212, 5222, 1221, 5200 |
| manager of branch store | ES | 1.23 | 1.42 | 1.25 | 5.58 | NA | NA | 1313, 1319, 1314 | 1323, 1219, 3334, 4221, NA |
| mayor | DP | 1.03 | 2.02 | 0.75 | 5.65 | NA | NA | NA | NA |
| mechanical engineer | DP | 1.63 | 1.69 | -0.06 | 5.68 | 60.50 | 77.89 | 2145 | 2144, 2149 |
| medic | AR | 2.78 | 2.62 | 1.86 | 9.27 | NA | NA | NA | NA |
| merchant | ES | 0.70 | 0.51 | 1.14 | 5.20 | NA | NA | NA | NA |
| migrant worker | ES | 0.79 | -0.97 | 0.10 | 5.17 | NA | NA | NA | NA |
| miner | ES | 0.94 | -0.13 | 0.59 | 4.80 | 32.23 | 31.71 | 7111, 7112, 9311 | 8311, 8111, 7542, 8111, 9311 |
| missionary | StS | 2.12 | 1.41 | -0.14 | 7.39 | NA | NA | NA | NA |
| motel owner | DP | 0.31 | 0.31 | 0.11 | 4.15 | NA | NA | NA | NA |
| music director | ES | 1.45 | 1.41 | 1.27 | 5.48 | NA | NA | NA | NA |
| musician | StS | 1.77 | 1.25 | 1.47 | 7.02 | 46.09 | 64.44 | 2453 | 2652 |
| negotiator | ES | 1.90 | 2.17 | 0.43 | 6.84 | NA | NA | NA | NA |
| newscaster | ES | 0.84 | 1.60 | 2.10 | 5.88 | NA | NA | NA | NA |
| night watchman | ES | 1.56 | 1.18 | -1.33 | 6.29 | NA | NA | NA | NA |
| nurse | AR | 2.84 | 1.75 | 0.53 | 8.77 | 36.50 | 41.32 | 3231 | 5321, 3221 |
| nursing assistant | StS | 2.32 | 0.94 | 0.38 | 7.28 | 40.48 | 43.73 | 5133, 3221, 5132 | 5322, 5329, 3256, 2240, 5246, 3255 |
| nutritionist | StS | 2.30 | 1.20 | 0.16 | 6.63 | 52.00 | 65.23 | 3223 | 2265 |
| online merchant | DP | 0.80 | 0.86 | 0.25 | 4.65 | NA | NA | NA | NA |
| ophthalmologist | ES | 1.60 | 1.43 | -0.34 | 5.82 | NA | NA | NA | NA |
| optical engineer | DP | 1.56 | 1.25 | -0.45 | 5.41 | NA | NA | NA | NA |
| organizer | StS | 2.07 | 1.68 | 0.48 | 7.44 | NA | NA | NA | NA |
| parking attendant | ES | 0.29 | -0.29 | -0.40 | 4.96 | NA | NA | NA | NA |
| part.time employee | ES | 0.93 | -0.61 | -0.03 | NA | NA | NA | NA | NA |
| pastor | StS | 1.89 | 2.31 | 0.72 | 7.42 | NA | NA | NA | NA |
| patrolman | DP | 1.01 | 1.24 | 0.33 | 5.04 | NA | NA | NA | NA |
| pawnbroker | DP | -0.39 | 0.42 | 0.95 | 3.88 | NA | NA | NA | NA |
| pediatrician | AR | 3.01 | 2.52 | 0.53 | 9.23 | NA | NA | NA | NA |
| pharmacist | ES | 2.09 | 1.38 | -0.42 | 6.67 | 64.00 | 81.13 | 2224 | 2262 |
| philanthropist | StS | 2.56 | 1.98 | 0.28 | 7.62 | NA | NA | NA | NA |
| philosopher | ES | 1.47 | 0.89 | -1.03 | 6.30 | NA | NA | NA | NA |
| photographer | ES | 1.68 | 1.20 | -0.68 | 5.85 | NA | NA | 3131, 7344 | 3521, 3431, NA |
| physician | StS | 2.41 | 2.35 | -0.04 | 7.86 | 58.30 | 65.62 | 3226, 3229 | 3423, 2269, 3255, 2264, 3259, 2266, 3210, 2263, 2269 |
| physicist | ES | 1.60 | 1.41 | -0.43 | 6.15 | NA | NA | 2110, 2100, 2111 | 2110, NA, 2112 |
| plumber | DP | 1.51 | 0.39 | -0.11 | 4.75 | 34.01 | 29.16 | 7136 | 7126 |
| police officer | StS | 1.05 | 2.49 | 1.43 | 6.94 | 44.84 | 54.22 | 5163, 5162 | 5413, 5412, 3355 |
| policeman | DP | 0.91 | 2.29 | 1.30 | 5.86 | NA | NA | NA | NA |
| political scientist | DP | 0.81 | 0.86 | 0.30 | 4.96 | NA | NA | NA | NA |
| politician | ES | -0.85 | 2.08 | 1.44 | 5.84 | NA | NA | NA | NA |
| pornographer | StS | -1.26 | 0.51 | 0.92 | 5.76 | NA | NA | NA | NA |
| president | StS | 1.29 | 2.98 | 1.13 | 7.80 | NA | NA | NA | NA |
| priest | StS | 1.89 | 2.13 | -0.91 | 7.94 | NA | NA | NA | NA |
| principal | ES | 1.57 | 2.42 | 0.74 | 6.22 | NA | NA | NA | NA |
| private eye | DP | 0.35 | 1.47 | -1.21 | 5.31 | NA | NA | NA | NA |
| probation officer | DP | 0.12 | 2.09 | 0.73 | 5.19 | NA | NA | NA | NA |
| professional | ES | 1.72 | 2.23 | 0.09 | 6.32 | 49.73 | 65.22 | 2412, 2419, 3432 | 2423, 2424, 2421, 1212, 2432, 3339, 2431, 4214, 3332, 2120, 3354, 3411, 4312, 3312 |
| professor | ES | 1.83 | 2.27 | 0.24 | 6.26 | 66.10 | 77.06 | 2310, 2230 | 2310, 2221 |
| prosecuting attorney | DP | 0.17 | 2.28 | 1.77 | 5.45 | NA | NA | NA | NA |
| prosecutor | DP | 0.15 | 2.53 | 1.46 | 5.68 | NA | NA | NA | NA |
| psychiatrist | ES | 1.68 | 1.71 | -1.02 | 6.71 | NA | NA | NA | NA |
| psychoanalyst | DP | 0.82 | 1.22 | -0.58 | 4.58 | NA | NA | NA | NA |
| psychologist | ES | 1.61 | 1.44 | -0.89 | 5.96 | 66.00 | 85.85 | 2445 | 2634 |
| public relations specialist | ES | 1.50 | 1.74 | 1.24 | 6.12 | NA | NA | NA | NA |
| radio and television announcer | StS | 0.76 | 1.24 | 2.44 | 6.04 | 50.00 | 54.00 | 3472 | 2656 |
| railroad conductor | DP | 1.05 | 1.18 | 0.94 | 4.80 | 34.28 | 38.80 | 5112 | 8310 |
| railroad engineer | ES | 1.17 | 1.05 | 1.07 | 5.16 | 32.53 | 35.12 | 8310, 8311, 8312 | 8312, 8311, 8312 |
| rancher | DP | 1.06 | 0.38 | -0.05 | 4.59 | NA | NA | NA | NA |
| real estate agent | DP | 0.79 | 1.04 | 1.21 | 4.49 | 49.00 | 62.39 | 3413 | 3334 |
| receptionist | ES | 1.27 | -0.16 | -0.04 | 5.24 | 33.62 | 39.02 | 4222 | 4224, 4226 |
| referee | DP | 0.71 | 2.06 | 1.45 | 5.55 | NA | NA | NA | NA |
| reporter | ES | 0.66 | 1.46 | 2.08 | 5.82 | NA | NA | NA | NA |
| researcher | ES | 1.93 | 1.80 | -0.56 | 6.42 | NA | NA | NA | NA |
| restaurant operator | ES | 1.33 | 1.65 | 1.92 | 5.97 | NA | NA | NA | NA |
| retailer | DP | 0.54 | 0.79 | 1.01 | 4.46 | NA | NA | NA | NA |
| roofer | ES | 0.86 | 0.41 | 0.92 | 5.21 | 31.00 | 22.16 | 7131 | 7121 |
| salesclerk | ES | 0.77 | -0.01 | 1.08 | 4.55 | 28.99 | 36.40 | 5220 | 5223, 5245, 5242, 5249 |
| salesperson | StS | 0.15 | 0.39 | 2.14 | 5.76 | 36.99 | 46.27 | 5200, 9110, 9113, 3415 | 5249, 5200, 5244, 3322, 4222, 2434 |
| scholar | StS | 2.48 | 2.24 | -0.45 | 8.43 | NA | NA | NA | NA |
| scientist | ES | 1.89 | 1.84 | -0.35 | 6.92 | 65.59 | 80.63 | 2213, 2440 | 2132, 2632 |
| secretary | StS | 1.59 | -0.22 | -0.31 | 5.98 | 48.81 | 54.55 | 4115 | 3343 |
| security guard | ES | 1.38 | 1.49 | -0.11 | 5.64 | NA | NA | 9152, 5110, 5169 | 9629, 3435, NA, 5414, 5419 |
| self.employed worker | ES | 1.87 | 1.81 | 0.85 | NA | NA | NA | NA | NA |
| senator | DP | 0.00 | 2.12 | 0.81 | 5.47 | NA | NA | NA | NA |
| server | StS | 1.77 | -0.07 | 0.71 | 6.08 | NA | NA | NA | NA |
| sewing machine operator | ES | 1.03 | -0.53 | -0.07 | 5.18 | NA | NA | 7436, 8263 | NA, 8153 |
| sheet metal worker | ES | 0.91 | 0.31 | 1.15 | 5.09 | NA | NA | 7213, 7310, 8223 | 7213, NA, 8122 |
| sheriff | ES | 1.07 | 2.42 | 1.07 | 6.59 | NA | NA | NA | NA |
| ship captain | StS | 1.89 | 2.54 | 1.47 | 7.21 | 55.44 | 52.70 | 3142 | 3152 |
| ship engineer | ES | 1.62 | 1.93 | 0.38 | 5.89 | NA | NA | NA | NA |
| shoe repairman | DP | 1.49 | 0.15 | -0.45 | 4.88 | 27.62 | 19.21 | 7442, 8266 | 7536, 8156 |
| shop clerk | ES | 1.27 | -0.38 | 0.10 | 5.45 | 38.94 | 43.56 | 4131 | 4321, 3331 |
| shopkeeper | ES | 1.15 | 0.25 | 0.22 | 5.02 | NA | NA | NA | NA |
| skilled worker | StS | 2.38 | 2.07 | 0.52 | 7.82 | NA | NA | NA | NA |
| social worker | StS | 2.12 | 1.27 | -0.10 | 7.12 | 52.26 | 64.57 | 2446, 3460 | 3412, 2635, 2635 |
| speech.language pathologist | ES | 1.86 | 1.22 | -0.43 | NA | NA | NA | NA | NA |
| state trooper | DP | 0.33 | 2.23 | 1.08 | 5.84 | NA | NA | NA | NA |
| statistician | DP | 0.91 | 0.63 | -0.70 | 4.94 | 58.16 | 81.78 | 2122 | 2120 |
| steel worker | ES | 0.83 | 0.53 | 1.05 | 5.15 | 41.13 | 30.32 | 8122 | 8121 |
| stenographer | DP | 0.74 | 0.06 | -0.40 | 3.84 | NA | NA | NA | NA |
| stockbroker | DP | 0.27 | 1.82 | 1.51 | 5.34 | 48.38 | 63.06 | 3411, 3429 | 3311, 3322, 3339 |
| storyteller | StS | 2.15 | 1.62 | 0.30 | 7.02 | NA | NA | NA | NA |
| street musician | AR | 1.23 | -0.45 | 1.71 | 6.37 | NA | NA | 3473 | NA |
| street preacher | AR | -0.36 | -0.40 | 2.06 | 6.69 | NA | NA | NA | NA |
| student teacher | ES | 1.80 | 0.32 | 0.47 | 5.56 | NA | NA | NA | NA |
| supervisor | DP | 0.76 | 1.99 | 0.73 | 4.86 | NA | NA | 1240, 7510 | NA, 3122 |
| surgeon | AR | 2.92 | 3.05 | -0.33 | 10.33 | NA | NA | NA | NA |
| switchboard operator | DP | 0.79 | 0.54 | 0.74 | 4.74 | 35.57 | 41.17 | 3132 | 4229, 9629, 3521 |
| systems engineer | DP | 1.36 | 1.41 | -0.06 | 5.14 | NA | NA | NA | NA |
| tailor | DP | 1.25 | 0.09 | -0.60 | 4.71 | 26.00 | 21.24 | 7433 | 7533 |
| tax preparer | DP | 0.69 | 1.31 | -0.70 | 4.95 | NA | NA | NA | NA |
| taxi driver | StS | 0.75 | -0.34 | 1.67 | 5.70 | 36.10 | 34.48 | 8322 | 8332, 8322, 3258, 8321 |
| teacher | StS | 2.50 | 2.31 | 0.32 | 7.76 | NA | NA | 2320, 2340, 3300, 3340, 2321, 2359 | 2330, 2352, 5312, 2300, NA, 2359 |
| technician | ES | 1.67 | 1.08 | 0.45 | 5.38 | NA | NA | 3110, 3112, 3118, 3212, 3111, 3113, 3115, 3119, 3211 | 3100, 3112, 2149, 3118, 3142, 3111, 3117, 3119, NA, 7421, NA, 3214, 3212, 5329, 3141 |
| telemarketer | AR | -1.76 | -1.55 | 1.76 | 7.78 | NA | NA | NA | NA |
| telephone installer | DP | 0.93 | -0.11 | 0.04 | 4.54 | NA | NA | 7244 | NA |
| telephone operator | ES | 0.40 | -0.18 | 0.57 | 4.94 | 42.15 | 38.58 | 4223 | 4223 |
| temporary worker | ES | 0.53 | -1.28 | -0.28 | 4.67 | NA | NA | NA | NA |
| textile worker | ES | 0.82 | -0.68 | 0.20 | 4.45 | 30.28 | 19.87 | 7435, 7437, 8262, 8264, 8269 | 7532, 7534, 8152, 9121, 8157, 8154, 8159, 7532 |
| ticket taker | DP | 0.36 | -0.47 | 0.09 | 4.51 | NA | NA | NA | NA |
| tool and die maker | DP | 0.80 | 0.19 | -0.15 | 4.71 | 39.84 | 33.62 | 7222, 7311 | 7223, 7222, 7311, 7412 |
| transportation ticket agent | DP | 0.40 | 0.01 | 0.26 | 4.29 | NA | NA | NA | NA |
| travel agent | StS | 1.43 | 0.54 | 0.98 | 5.87 | 43.00 | 49.30 | 4221 | 4221 |
| truck driver | DP | 0.61 | 0.55 | 0.51 | 4.65 | NA | NA | 8324 | NA |
| tutor | ES | 2.39 | 1.66 | -0.31 | 6.70 | NA | NA | NA | NA |
| tv repairman | DP | 0.96 | -0.04 | -0.21 | 4.62 | NA | NA | 7242 | NA |
| typist | ES | 0.61 | -0.38 | 1.04 | 5.00 | 42.60 | 50.33 | 4111 | 4131, 4419, 3344 |
| usher | DP | 1.61 | 0.83 | -0.29 | 4.92 | NA | NA | NA | NA |
| veterinarian | StS | 2.80 | 2.01 | -0.09 | 7.71 | 61.00 | 84.14 | 2223 | 2250 |
| wage earner | ES | 1.76 | 1.13 | 0.09 | 5.35 | NA | NA | NA | NA |
| waiter | StS | 1.31 | -0.16 | 1.27 | 5.39 | NA | NA | NA | NA |
| waitress | StS | 1.50 | -0.21 | 1.30 | 5.61 | 20.89 | 30.47 | 5123 | 5131, 5169, 5246, 5132 |
| warden | DP | -0.18 | 2.25 | 0.84 | 5.61 | NA | NA | NA | NA |
| watchman | DP | 1.50 | 1.40 | -1.28 | 5.58 | NA | NA | NA | NA |
| web developer | DP | 1.21 | 1.22 | -0.96 | 5.70 | NA | NA | NA | NA |
| welder | DP | 0.92 | 0.51 | 0.88 | 4.76 | 39.00 | 28.52 | 7212 | 7212 |
| wholesaler | DP | 0.80 | 1.08 | 0.54 | 4.78 | 45.48 | 49.84 | 3416 | 3323, 4110 |
| writer | ES | 1.55 | 2.03 | -1.18 | 6.84 | NA | NA | NA | NA |

**Appendix B: Descriptive Statistics for Analytic Sample**

| **Variable** | **N = 424***1* |
| --- | --- |
| Age | 36 (30, 44) |
| Sex |  |
| Female | 162 (38%) |
| Male | 262 (62%) |
| Module |  |
| 1 | 25 (5.9%) |
| 2 | 26 (6.1%) |
| 3 | 31 (7.3%) |
| 4 | 29 (6.8%) |
| 5 | 25 (5.9%) |
| 6 | 27 (6.4%) |
| 7 | 27 (6.4%) |
| 8 | 26 (6.1%) |
| 9 | 24 (5.7%) |
| 10 | 22 (5.2%) |
| 11 | 26 (6.1%) |
| 12 | 24 (5.7%) |
| 13 | 29 (6.8%) |
| 14 | 28 (6.6%) |
| 15 | 25 (5.9%) |
| 16 | 30 (7.1%) |
| Race |  |
| American Indian or Alaskan Native | 3 (0.7%) |
| Asian | 17 (4.0%) |
| Black or African American | 29 (6.8%) |
| Hispanic or Latina/Latino | 8 (1.9%) |
| Mixed Race | 18 (4.2%) |
| Other | 4 (0.9%) |
| White or Caucasian | 345 (81%) |
| Education |  |
| Some high school, no degree | 4 (0.9%) |
| High school graduate or equivalent | 38 (9.0%) |
| Vocational trade program or  apprenticeship | 21 (5.0%) |
| Some college, no degree | 46 (11%) |
| Bachelor's degree | 246 (58%) |
| Master's degree | 65 (15%) |
| Doctorate (PhD) or some other  advanced degree (e.g. M.D., or J.D.) | 4 (0.9%) |
| *1*Median (IQR); n (%) | |

**Appendix C: Full Stimuli List, by Module**

| M | actor | object | Optimal | Random | Distance | Distance (std) |
| --- | --- | --- | --- | --- | --- | --- |
| 1 | bailiff | bailiff | show something to | get even with | 8.391 | −0.875 |
| 2 | bailiff | bailiff | show something to | leave | 8.821 | −0.820 |
| 3 | bailiff | civil engineer | serve | bicker with | 15.419 | 0.024 |
| 4 | bailiff | civil engineer | serve | yell at | 17.056 | 0.234 |
| 5 | bailiff | cook | ask about | laugh at | 7.847 | −0.945 |
| 6 | bailiff | cook | ask about | provoke | 12.921 | −0.295 |
| 7 | bailiff | crane operator | show something to | gawk at | 7.810 | −0.949 |
| 8 | bailiff | crane operator | show something to | blabber to | 11.588 | −0.466 |
| 9 | bailiff | defense attorney | sit next to | exclude | 13.836 | −0.178 |
| 10 | bailiff | defense attorney | sit next to | terrorize | 27.026 | 1.510 |
| 11 | bailiff | dental hygienist | identify | sneer at | 13.141 | −0.267 |
| 12 | bailiff | dental hygienist | identify | terrorize | 27.225 | 1.535 |
| 13 | bailiff | dentist | serve | apprehend | 5.448 | −1.252 |
| 14 | bailiff | dentist | serve | debase | 9.750 | −0.701 |
| 15 | bailiff | firefighter | ask about | baby | 10.812 | −0.565 |
| 16 | bailiff | firefighter | ask about | dominate | 14.500 | −0.093 |
| 3 | bailiff | foreman | show something to | criticize | 6.594 | −1.105 |
| 4 | bailiff | foreman | show something to | confine | 10.203 | −0.643 |
| 5 | bailiff | musician | identify | assist | 5.236 | −1.279 |
| 6 | bailiff | musician | identify | defame | 11.218 | −0.513 |
| 7 | bailiff | nurse | ask about | flee | 5.377 | −1.261 |
| 8 | bailiff | nurse | ask about | liberate | 6.309 | −1.141 |
| 9 | bailiff | nutritionist | escort | chide | 6.134 | −1.164 |
| 10 | bailiff | nutritionist | escort | imitate | 7.795 | −0.951 |
| 11 | bailiff | pediatrician | ask about | argue with | 14.525 | −0.090 |
| 12 | bailiff | pediatrician | ask about | conspire against | 15.204 | −0.003 |
| 13 | bailiff | surgeon | ask about | alert | 5.560 | −1.237 |
| 14 | bailiff | surgeon | ask about | doubt | 7.571 | −0.980 |
| 15 | bailiff | teacher | ask about | flee | 5.389 | −1.259 |
| 16 | bailiff | teacher | ask about | torment | 24.038 | 1.127 |
| 1 | bailiff | technician | show something to | hunt for | 7.247 | −1.021 |
| 2 | bailiff | technician | show something to | distrust | 7.800 | −0.951 |
| 5 | civil engineer | bailiff | serve | mother | 5.187 | −1.285 |
| 6 | civil engineer | bailiff | serve | debase | 12.039 | −0.408 |
| 7 | civil engineer | civil engineer | turn to | hassle | 22.981 | 0.992 |
| 8 | civil engineer | civil engineer | turn to | shaft | 21.132 | 0.756 |
| 9 | civil engineer | cook | turn to | brush off | 12.264 | −0.379 |
| 10 | civil engineer | cook | turn to | distress | 17.445 | 0.284 |
| 11 | civil engineer | crane operator | turn to | demote | 9.876 | −0.685 |
| 12 | civil engineer | crane operator | turn to | upstage | 13.923 | −0.167 |
| 13 | civil engineer | defense attorney | serve | defend | 9.385 | −0.748 |
| 14 | civil engineer | defense attorney | serve | grab | 13.127 | −0.269 |
| 15 | civil engineer | dental hygienist | turn to | baits | 13.597 | −0.209 |
| 16 | civil engineer | dental hygienist | turn to | bicker with | 19.565 | 0.555 |
| 1 | civil engineer | dentist | turn to | amaze | 6.691 | −1.092 |
| 2 | civil engineer | dentist | turn to | misunderstand | 14.172 | −0.135 |
| 3 | civil engineer | firefighter | answer | sentence | 8.797 | −0.823 |
| 4 | civil engineer | firefighter | answer | unnerve | 11.825 | −0.436 |
| 7 | civil engineer | foreman | excuse | stare at | 7.351 | −1.008 |
| 8 | civil engineer | foreman | excuse | criticize | 10.049 | −0.663 |
| 9 | civil engineer | musician | turn to | overcharge | 21.799 | 0.841 |
| 10 | civil engineer | musician | turn to | cheat | 27.400 | 1.558 |
| 11 | civil engineer | nurse | consult | have a heart to heart talk with | 5.260 | −1.276 |
| 12 | civil engineer | nurse | consult | expel | 18.779 | 0.455 |
| 13 | civil engineer | nutritionist | consult | cheer | 9.076 | −0.787 |
| 14 | civil engineer | nutritionist | consult | impede | 12.886 | −0.300 |
| 15 | civil engineer | pediatrician | answer | avoid | 13.668 | −0.200 |
| 16 | civil engineer | pediatrician | answer | fool | 16.350 | 0.144 |
| 1 | civil engineer | surgeon | ask about | baby | 13.322 | −0.244 |
| 2 | civil engineer | surgeon | ask about | cut the pay of | 21.276 | 0.774 |
| 3 | civil engineer | teacher | turn to | interfere with | 12.322 | −0.372 |
| 4 | civil engineer | teacher | turn to | upstage | 14.221 | −0.129 |
| 5 | civil engineer | technician | turn to | gossip with | 12.950 | −0.292 |
| 6 | civil engineer | technician | turn to | seize | 18.321 | 0.396 |
| 9 | cook | bailiff | chat with | soothe | 7.478 | −0.992 |
| 10 | cook | bailiff | chat with | chide | 8.235 | −0.895 |
| 11 | cook | civil engineer | chat with | flee | 8.014 | −0.923 |
| 12 | cook | civil engineer | chat with | glare at | 18.415 | 0.408 |
| 13 | cook | cook | toast | flee | 8.304 | −0.886 |
| 14 | cook | cook | toast | intimidate | 16.350 | 0.144 |
| 15 | cook | crane operator | chat with | scare | 12.255 | −0.380 |
| 16 | cook | crane operator | chat with | overlook | 18.882 | 0.468 |
| 1 | cook | defense attorney | chat with | restrain | 10.596 | −0.593 |
| 2 | cook | defense attorney | chat with | scowl at | 15.742 | 0.066 |
| 3 | cook | dental hygienist | chat with | quiet | 8.782 | −0.825 |
| 4 | cook | dental hygienist | chat with | confuse | 13.428 | −0.230 |
| 5 | cook | dentist | chat with | fluster | 6.515 | −1.115 |
| 6 | cook | dentist | chat with | borrow money from | 14.476 | −0.096 |
| 7 | cook | firefighter | joke with | bind | 17.432 | 0.282 |
| 8 | cook | firefighter | joke with | seize | 19.002 | 0.483 |
| 11 | cook | foreman | chat with | bill | 5.657 | −1.225 |
| 12 | cook | foreman | chat with | educate | 7.280 | −1.017 |
| 13 | cook | musician | chat with | curtsey to | 6.154 | −1.161 |
| 14 | cook | musician | chat with | abet | 7.283 | −1.017 |
| 15 | cook | nurse | joke with | misjudge | 21.268 | 0.773 |
| 16 | cook | nurse | joke with | haunt | 30.403 | 1.942 |
| 1 | cook | nutritionist | toast | disillusion | 16.574 | 0.172 |
| 2 | cook | nutritionist | toast | jeer | 20.509 | 0.676 |
| 3 | cook | pediatrician | joke with | bewilder | 8.154 | −0.905 |
| 4 | cook | pediatrician | joke with | disobey | 14.938 | −0.037 |
| 5 | cook | surgeon | joke with | hypnotize | 14.250 | −0.125 |
| 6 | cook | surgeon | joke with | forget | 23.887 | 1.108 |
| 7 | cook | teacher | joke with | horrify | 21.600 | 0.815 |
| 8 | cook | teacher | joke with | ensnare | 16.889 | 0.213 |
| 9 | cook | technician | chat with | provoke | 16.010 | 0.100 |
| 10 | cook | technician | chat with | disregard | 21.494 | 0.802 |
| 13 | crane operator | bailiff | sit next to | jeer | 14.983 | −0.031 |
| 14 | crane operator | bailiff | sit next to | mortify | 17.265 | 0.261 |
| 15 | crane operator | civil engineer | ask about | refuse | 6.026 | −1.178 |
| 16 | crane operator | civil engineer | ask about | sentence | 7.246 | −1.021 |
| 1 | crane operator | cook | ask about | deny | 6.350 | −1.136 |
| 2 | crane operator | cook | ask about | accost | 9.463 | −0.738 |
| 3 | crane operator | crane operator | show something to | misunderstand | 9.244 | −0.766 |
| 4 | crane operator | crane operator | show something to | mumble to | 14.495 | −0.094 |
| 5 | crane operator | defense attorney | sit next to | bawl out | 8.140 | −0.907 |
| 6 | crane operator | defense attorney | sit next to | defend | 10.525 | −0.602 |
| 7 | crane operator | dental hygienist | ask about | frighten | 11.642 | −0.459 |
| 8 | crane operator | dental hygienist | ask about | denigrate | 12.247 | −0.381 |
| 9 | crane operator | dentist | ask about | blame | 13.809 | −0.182 |
| 10 | crane operator | dentist | ask about | hate | 17.621 | 0.306 |
| 11 | crane operator | firefighter | ask about | follow | 7.090 | −1.041 |
| 12 | crane operator | firefighter | ask about | badger | 14.937 | −0.037 |
| 15 | crane operator | foreman | show something to | distract | 6.216 | −1.153 |
| 16 | crane operator | foreman | show something to | shock | 7.358 | −1.007 |
| 1 | crane operator | musician | ask about | misjudge | 13.178 | −0.262 |
| 2 | crane operator | musician | ask about | walk out on | 14.508 | −0.092 |
| 3 | crane operator | nurse | ask about | sneer at | 14.122 | −0.141 |
| 4 | crane operator | nurse | ask about | mouth off to | 15.768 | 0.069 |
| 5 | crane operator | nutritionist | ask about | upstage | 10.421 | −0.615 |
| 6 | crane operator | nutritionist | ask about | hinder | 12.549 | −0.343 |
| 7 | crane operator | pediatrician | ask about | loathe | 16.006 | 0.100 |
| 8 | crane operator | pediatrician | ask about | hate | 19.826 | 0.588 |
| 9 | crane operator | surgeon | ask about | hurry | 7.159 | −1.033 |
| 10 | crane operator | surgeon | ask about | abandon | 25.761 | 1.348 |
| 11 | crane operator | teacher | ask about | fool | 12.974 | −0.288 |
| 12 | crane operator | teacher | ask about | undermine | 15.590 | 0.046 |
| 13 | crane operator | technician | ask about | understand | 7.627 | −0.973 |
| 14 | crane operator | technician | ask about | dismiss | 9.599 | −0.720 |
| 2 | defense attorney | bailiff | bargain with | harangue | 6.853 | −1.072 |
| 3 | defense attorney | bailiff | bargain with | submit to | 15.279 | 0.007 |
| 4 | defense attorney | civil engineer | call | hypnotize | 6.642 | −1.099 |
| 5 | defense attorney | civil engineer | call | sicken | 19.167 | 0.504 |
| 6 | defense attorney | cook | acclaim | stymie | 6.952 | −1.059 |
| 7 | defense attorney | cook | acclaim | seize | 13.388 | −0.235 |
| 8 | defense attorney | crane operator | bargain with | delay payment to | 20.191 | 0.635 |
| 9 | defense attorney | crane operator | bargain with | mimic | 7.681 | −0.966 |
| 10 | defense attorney | defense attorney | bargain with | bug | 10.279 | −0.633 |
| 11 | defense attorney | defense attorney | bargain with | scoff at | 11.463 | −0.482 |
| 12 | defense attorney | dental hygienist | acclaim | obey | 6.365 | −1.134 |
| 13 | defense attorney | dental hygienist | acclaim | frustrate | 11.172 | −0.519 |
| 14 | defense attorney | dentist | call | forgive | 9.334 | −0.754 |
| 15 | defense attorney | dentist | call | confine | 14.763 | −0.059 |
| 16 | defense attorney | firefighter | toast | hide | 10.974 | −0.544 |
| 1 | defense attorney | firefighter | toast | insult | 20.258 | 0.644 |
| 4 | defense attorney | foreman | bargain with | accept | 5.014 | −1.307 |
| 5 | defense attorney | foreman | bargain with | dismiss | 7.858 | −0.943 |
| 6 | defense attorney | musician | acclaim | monitor | 7.121 | −1.037 |
| 7 | defense attorney | musician | acclaim | haze | 18.573 | 0.428 |
| 8 | defense attorney | nurse | acclaim | coerce | 8.428 | −0.870 |
| 9 | defense attorney | nurse | acclaim | upset | 17.873 | 0.339 |
| 10 | defense attorney | nutritionist | acclaim | plot against | 21.029 | 0.742 |
| 11 | defense attorney | nutritionist | acclaim | betray | 25.725 | 1.343 |
| 12 | defense attorney | pediatrician | toast | disconcert | 12.241 | −0.382 |
| 13 | defense attorney | pediatrician | toast | corrupt | 26.346 | 1.423 |
| 14 | defense attorney | surgeon | chat with | hurry | 5.385 | −1.260 |
| 15 | defense attorney | surgeon | chat with | prod | 7.794 | −0.951 |
| 16 | defense attorney | teacher | call | hold | 9.643 | −0.715 |
| 1 | defense attorney | teacher | call | torment | 25.608 | 1.328 |
| 2 | defense attorney | technician | acclaim | upset | 15.665 | 0.056 |
| 3 | defense attorney | technician | acclaim | endanger | 21.704 | 0.829 |
| 6 | dental hygienist | bailiff | serve | hush | 5.411 | −1.256 |
| 7 | dental hygienist | bailiff | serve | defame | 12.993 | −0.286 |
| 8 | dental hygienist | civil engineer | ask about | harangue | 10.590 | −0.594 |
| 9 | dental hygienist | civil engineer | ask about | hound | 12.912 | −0.296 |
| 10 | dental hygienist | cook | ask about | obstruct | 12.789 | −0.312 |
| 11 | dental hygienist | cook | ask about | abandon | 26.605 | 1.456 |
| 12 | dental hygienist | crane operator | serve | care for | 9.425 | −0.743 |
| 13 | dental hygienist | crane operator | serve | deprive | 16.755 | 0.195 |
| 14 | dental hygienist | defense attorney | serve | implicate | 6.089 | −1.170 |
| 15 | dental hygienist | defense attorney | serve | restrain | 12.025 | −0.410 |
| 16 | dental hygienist | dental hygienist | ask about | subdue | 7.446 | −0.996 |
| 1 | dental hygienist | dental hygienist | ask about | deflate | 16.249 | 0.131 |
| 2 | dental hygienist | dentist | ask about | support | 6.329 | −1.139 |
| 3 | dental hygienist | dentist | ask about | bait | 13.528 | −0.217 |
| 4 | dental hygienist | firefighter | ask about | holler at | 9.047 | −0.791 |
| 5 | dental hygienist | firefighter | ask about | misinform | 17.540 | 0.296 |
| 8 | dental hygienist | foreman | serve | misunderstand | 10.429 | −0.614 |
| 9 | dental hygienist | foreman | serve | heckle | 16.236 | 0.129 |
| 10 | dental hygienist | musician | ask about | bawl out | 10.266 | −0.635 |
| 11 | dental hygienist | musician | ask about | overwhelm | 11.218 | −0.513 |
| 12 | dental hygienist | nurse | ask about | give in to | 12.016 | −0.411 |
| 13 | dental hygienist | nurse | ask about | infuriate | 18.573 | 0.428 |
| 14 | dental hygienist | nutritionist | ask about | hush | 6.233 | −1.151 |
| 15 | dental hygienist | nutritionist | ask about | abuse | 32.891 | 2.260 |
| 16 | dental hygienist | pediatrician | ask about | kowtow to | 9.986 | −0.671 |
| 1 | dental hygienist | pediatrician | ask about | pester | 17.056 | 0.234 |
| 2 | dental hygienist | surgeon | ask about | scoff at | 15.229 | 0.000 |
| 3 | dental hygienist | surgeon | ask about | corner | 15.543 | 0.040 |
| 4 | dental hygienist | teacher | ask about | reproach | 6.291 | −1.144 |
| 5 | dental hygienist | teacher | ask about | berate | 18.388 | 0.404 |
| 6 | dental hygienist | technician | ask about | mother | 6.223 | −1.152 |
| 7 | dental hygienist | technician | ask about | walk out on | 17.322 | 0.268 |
| 10 | dentist | bailiff | serve | assist | 5.073 | −1.300 |
| 11 | dentist | bailiff | serve | apprehend | 7.118 | −1.038 |
| 12 | dentist | civil engineer | turn to | subdue | 7.999 | −0.925 |
| 13 | dentist | civil engineer | turn to | threaten | 28.603 | 1.712 |
| 14 | dentist | cook | consult | bait | 14.103 | −0.144 |
| 15 | dentist | cook | consult | upset | 20.130 | 0.627 |
| 16 | dentist | crane operator | serve | baby | 10.609 | −0.591 |
| 1 | dentist | crane operator | serve | fail | 18.234 | 0.385 |
| 2 | dentist | defense attorney | serve | corner | 13.706 | −0.195 |
| 3 | dentist | defense attorney | serve | double cross | 22.178 | 0.889 |
| 4 | dentist | dental hygienist | consult | reproach | 6.850 | −1.072 |
| 5 | dentist | dental hygienist | consult | hound | 14.823 | −0.052 |
| 6 | dentist | dentist | turn to | admonish | 5.445 | −1.252 |
| 7 | dentist | dentist | turn to | swindle | 21.428 | 0.793 |
| 8 | dentist | firefighter | answer | understand | 5.982 | −1.183 |
| 9 | dentist | firefighter | answer | tell off | 12.076 | −0.403 |
| 12 | dentist | foreman | excuse | rebuff | 6.097 | −1.168 |
| 13 | dentist | foreman | excuse | cave in to | 13.262 | −0.252 |
| 14 | dentist | musician | consult | tantalize | 8.006 | −0.924 |
| 15 | dentist | musician | consult | sicken | 20.913 | 0.727 |
| 16 | dentist | nurse | answer | anger | 19.017 | 0.485 |
| 1 | dentist | nurse | answer | fear | 24.418 | 1.176 |
| 2 | dentist | nutritionist | consult | provoke | 15.622 | 0.050 |
| 3 | dentist | nutritionist | consult | jeer | 20.255 | 0.643 |
| 4 | dentist | pediatrician | answer | dupe | 19.255 | 0.515 |
| 5 | dentist | pediatrician | answer | offend | 19.409 | 0.535 |
| 6 | dentist | surgeon | ask about | forgive | 7.088 | −1.042 |
| 7 | dentist | surgeon | ask about | anger | 20.487 | 0.673 |
| 8 | dentist | teacher | ask about | despise | 17.024 | 0.230 |
| 9 | dentist | teacher | ask about | insult | 23.341 | 1.038 |
| 10 | dentist | technician | turn to | stammer at | 11.601 | −0.464 |
| 11 | dentist | technician | turn to | overwhelm | 11.806 | −0.438 |
| 14 | firefighter | bailiff | greet | extort | 25.652 | 1.334 |
| 15 | firefighter | bailiff | greet | antagonize | 29.879 | 1.875 |
| 16 | firefighter | civil engineer | congratulate | retaliate against | 17.660 | 0.311 |
| 1 | firefighter | civil engineer | congratulate | kowtow to | 26.990 | 1.505 |
| 2 | firefighter | cook | amuse | analyze | 13.587 | −0.210 |
| 3 | firefighter | cook | amuse | annoy | 25.641 | 1.333 |
| 4 | firefighter | crane operator | coach | examine | 10.342 | −0.625 |
| 5 | firefighter | crane operator | coach | deprave | 29.417 | 1.816 |
| 6 | firefighter | defense attorney | greet | hail | 6.621 | −1.101 |
| 7 | firefighter | defense attorney | greet | patronize | 20.993 | 0.738 |
| 8 | firefighter | dental hygienist | congratulate | comfort | 10.589 | −0.594 |
| 9 | firefighter | dental hygienist | congratulate | dismay | 28.833 | 1.741 |
| 10 | firefighter | dentist | congratulate | reform | 7.818 | −0.948 |
| 11 | firefighter | dentist | congratulate | ridicule | 38.535 | 2.983 |
| 12 | firefighter | firefighter | excite | stammer at | 25.556 | 1.322 |
| 13 | firefighter | firefighter | excite | delude | 30.457 | 1.949 |
| 16 | firefighter | foreman | coach | walk out on | 24.457 | 1.181 |
| 1 | firefighter | foreman | coach | plot against | 30.271 | 1.925 |
| 2 | firefighter | musician | congratulate | pooh pooh | 25.071 | 1.260 |
| 3 | firefighter | musician | congratulate | bother | 28.166 | 1.656 |
| 4 | firefighter | nurse | applaud | confuse | 24.140 | 1.141 |
| 5 | firefighter | nurse | applaud | frame | 46.151 | 3.957 |
| 6 | firefighter | nutritionist | applaud | be sarcastic toward | 16.235 | 0.129 |
| 7 | firefighter | nutritionist | applaud | bribe | 23.796 | 1.096 |
| 8 | firefighter | pediatrician | applaud | hunt for | 24.411 | 1.175 |
| 9 | firefighter | pediatrician | applaud | scrutinize | 28.149 | 1.654 |
| 10 | firefighter | surgeon | laugh with | have a heart to heart talk with | 13.461 | −0.226 |
| 11 | firefighter | surgeon | laugh with | fool | 30.191 | 1.915 |
| 12 | firefighter | teacher | laugh with | bequeath to | 10.972 | −0.545 |
| 13 | firefighter | teacher | laugh with | quibble with | 20.567 | 0.683 |
| 14 | firefighter | technician | congratulate | concede to | 26.395 | 1.429 |
| 15 | firefighter | technician | congratulate | fear | 44.925 | 3.800 |
| 15 | foreman | bailiff | show something to | drive out | 7.182 | −1.030 |
| 14 | foreman | bailiff | show something to | displease | 8.333 | −0.882 |
| 13 | foreman | civil engineer | show something to | apologize to | 5.971 | −1.185 |
| 12 | foreman | civil engineer | show something to | hurt | 20.517 | 0.677 |
| 11 | foreman | cook | ask about | abhor | 12.264 | −0.379 |
| 10 | foreman | cook | ask about | threaten | 22.911 | 0.983 |
| 9 | foreman | crane operator | show something to | scare | 8.953 | −0.803 |
| 8 | foreman | crane operator | show something to | mock | 15.517 | 0.037 |
| 7 | foreman | defense attorney | emulate | welcome | 6.702 | −1.091 |
| 6 | foreman | defense attorney | emulate | haze | 17.698 | 0.316 |
| 5 | foreman | dental hygienist | show something to | snuggle | 6.858 | −1.071 |
| 4 | foreman | dental hygienist | show something to | discomfort | 12.394 | −0.363 |
| 3 | foreman | dentist | show something to | hurry | 6.432 | −1.126 |
| 2 | foreman | dentist | show something to | elect | 7.231 | −1.023 |
| 1 | foreman | firefighter | ask about | bait | 12.296 | −0.375 |
| 16 | foreman | firefighter | ask about | disparage | 14.503 | −0.093 |
| 13 | foreman | foreman | show something to | disappoint | 15.535 | 0.039 |
| 12 | foreman | foreman | show something to | exploit | 16.756 | 0.196 |
| 11 | foreman | musician | show something to | kowtow to | 8.966 | −0.801 |
| 10 | foreman | musician | show something to | mislead | 13.063 | −0.277 |
| 9 | foreman | nurse | ask about | box | 9.096 | −0.785 |
| 8 | foreman | nurse | ask about | extort | 15.865 | 0.082 |
| 7 | foreman | nutritionist | ask about | doubt | 5.815 | −1.205 |
| 6 | foreman | nutritionist | ask about | borrow money from | 6.937 | −1.061 |
| 5 | foreman | pediatrician | ask about | disobey | 8.609 | −0.847 |
| 4 | foreman | pediatrician | ask about | give in to | 10.620 | −0.590 |
| 3 | foreman | surgeon | ask about | subdue | 7.144 | −1.035 |
| 2 | foreman | surgeon | ask about | submit to | 12.708 | −0.322 |
| 1 | foreman | teacher | ask about | disqualify | 7.962 | −0.930 |
| 16 | foreman | teacher | ask about | fire from a job | 9.022 | −0.794 |
| 15 | foreman | technician | show something to | deflate | 12.321 | −0.372 |
| 14 | foreman | technician | show something to | make fun of | 19.394 | 0.533 |
| 11 | musician | bailiff | call | bribe | 10.119 | −0.654 |
| 10 | musician | bailiff | call | snub | 12.757 | −0.316 |
| 9 | musician | civil engineer | chat with | examine | 6.487 | −1.119 |
| 8 | musician | civil engineer | chat with | bluff | 10.130 | −0.652 |
| 7 | musician | cook | chat with | chide | 8.491 | −0.862 |
| 6 | musician | cook | chat with | evade | 11.168 | −0.520 |
| 5 | musician | crane operator | call | mislead | 16.913 | 0.216 |
| 4 | musician | crane operator | call | scream at | 22.551 | 0.937 |
| 3 | musician | defense attorney | call | reject | 9.074 | −0.788 |
| 2 | musician | defense attorney | call | condemn | 18.832 | 0.461 |
| 1 | musician | dental hygienist | chat with | displease | 14.707 | −0.067 |
| 16 | musician | dental hygienist | chat with | complain about | 15.021 | −0.026 |
| 15 | musician | dentist | chat with | grapple with | 7.237 | −1.023 |
| 14 | musician | dentist | chat with | leer at | 13.444 | −0.228 |
| 13 | musician | firefighter | joke with | indoctrinate | 8.912 | −0.808 |
| 12 | musician | firefighter | joke with | lie to | 23.881 | 1.107 |
| 9 | musician | foreman | call | confuse | 8.413 | −0.872 |
| 8 | musician | foreman | call | interrupt | 13.657 | −0.201 |
| 7 | musician | musician | chat with | obey | 5.955 | −1.187 |
| 6 | musician | musician | chat with | displease | 14.794 | −0.055 |
| 5 | musician | nurse | joke with | criticize | 9.099 | −0.784 |
| 4 | musician | nurse | joke with | suspect | 12.186 | −0.389 |
| 3 | musician | nutritionist | chat with | observe | 10.906 | −0.553 |
| 2 | musician | nutritionist | chat with | lie to | 21.907 | 0.855 |
| 1 | musician | pediatrician | joke with | discredit | 15.711 | 0.062 |
| 16 | musician | pediatrician | joke with | frame | 33.537 | 2.343 |
| 15 | musician | surgeon | joke with | order | 10.376 | −0.621 |
| 14 | musician | surgeon | joke with | evade | 12.187 | −0.389 |
| 13 | musician | teacher | chat with | box | 10.249 | −0.637 |
| 12 | musician | teacher | chat with | unfriend | 14.046 | −0.151 |
| 11 | musician | technician | chat with | inspect | 5.862 | −1.199 |
| 10 | musician | technician | chat with | disbelieve | 8.929 | −0.806 |
| 7 | nurse | bailiff | dine with | applaud | 8.897 | −0.810 |
| 6 | nurse | bailiff | dine with | jest | 10.689 | −0.581 |
| 5 | nurse | civil engineer | dine with | obey | 6.080 | −1.171 |
| 4 | nurse | civil engineer | dine with | hypnotize | 8.402 | −0.873 |
| 3 | nurse | cook | reply to | malign | 19.132 | 0.500 |
| 2 | nurse | cook | reply to | chew out | 23.791 | 1.096 |
| 1 | nurse | crane operator | dine with | inspire | 5.237 | −1.279 |
| 16 | nurse | crane operator | dine with | tempt | 13.529 | −0.217 |
| 15 | nurse | defense attorney | dine with | bluff | 11.201 | −0.515 |
| 14 | nurse | defense attorney | dine with | sneer at | 21.136 | 0.756 |
| 13 | nurse | dental hygienist | invite | evade | 13.972 | −0.161 |
| 12 | nurse | dental hygienist | invite | desert | 28.757 | 1.731 |
| 11 | nurse | dentist | dine with | mortify | 27.335 | 1.549 |
| 10 | nurse | dentist | dine with | haunt | 27.578 | 1.580 |
| 9 | nurse | firefighter | chat with | obstruct | 16.797 | 0.201 |
| 8 | nurse | firefighter | chat with | double cross | 29.090 | 1.774 |
| 5 | nurse | foreman | admire | elude | 8.470 | −0.865 |
| 4 | nurse | foreman | admire | sicken | 25.185 | 1.274 |
| 3 | nurse | musician | invite | flee | 10.607 | −0.591 |
| 2 | nurse | musician | invite | grapple with | 12.245 | −0.382 |
| 1 | nurse | nurse | reply to | alarm | 9.711 | −0.706 |
| 16 | nurse | nurse | reply to | short change | 26.947 | 1.500 |
| 15 | nurse | nutritionist | reply to | assess | 5.437 | −1.253 |
| 14 | nurse | nutritionist | reply to | get even with | 17.970 | 0.351 |
| 13 | nurse | pediatrician | reply to | befuddle | 14.055 | −0.150 |
| 12 | nurse | pediatrician | reply to | curse | 25.849 | 1.359 |
| 11 | nurse | surgeon | eat with | borrow money from | 15.506 | 0.036 |
| 10 | nurse | surgeon | eat with | yell at | 22.346 | 0.911 |
| 9 | nurse | teacher | reply to | tell off | 14.845 | −0.049 |
| 8 | nurse | teacher | reply to | envy | 29.363 | 1.809 |
| 7 | nurse | technician | invite | chide | 12.221 | −0.385 |
| 6 | nurse | technician | invite | baby | 18.161 | 0.375 |
| 3 | nutritionist | bailiff | turn to | detain | 9.866 | −0.686 |
| 2 | nutritionist | bailiff | turn to | undermine | 18.290 | 0.392 |
| 1 | nutritionist | civil engineer | dine with | reproach | 8.258 | −0.892 |
| 16 | nutritionist | civil engineer | dine with | hound | 16.343 | 0.143 |
| 15 | nutritionist | cook | dine with | confound | 5.955 | −1.187 |
| 14 | nutritionist | cook | dine with | blabber to | 15.502 | 0.035 |
| 13 | nutritionist | crane operator | turn to | beseech | 7.813 | −0.949 |
| 12 | nutritionist | crane operator | turn to | cut someone down to size | 13.406 | −0.233 |
| 11 | nutritionist | defense attorney | serve | rib | 11.360 | −0.495 |
| 10 | nutritionist | defense attorney | serve | repulse | 19.275 | 0.518 |
| 9 | nutritionist | dental hygienist | turn to | giggle at | 5.039 | −1.304 |
| 8 | nutritionist | dental hygienist | turn to | nag | 21.483 | 0.800 |
| 7 | nutritionist | dentist | turn to | follow | 8.513 | −0.859 |
| 6 | nutritionist | dentist | turn to | shock | 11.528 | −0.473 |
| 5 | nutritionist | firefighter | answer | save | 10.759 | −0.572 |
| 4 | nutritionist | firefighter | answer | demand | 13.743 | −0.190 |
| 1 | nutritionist | foreman | turn to | confront | 6.259 | −1.148 |
| 16 | nutritionist | foreman | turn to | freakout | 17.540 | 0.296 |
| 15 | nutritionist | musician | turn to | stare down | 15.440 | 0.027 |
| 14 | nutritionist | musician | turn to | anger | 21.166 | 0.760 |
| 13 | nutritionist | nurse | answer | dispute | 6.266 | −1.147 |
| 12 | nutritionist | nurse | answer | coerce | 10.346 | −0.625 |
| 11 | nutritionist | nutritionist | answer | ban | 15.281 | 0.007 |
| 10 | nutritionist | nutritionist | answer | enrage | 23.051 | 1.001 |
| 9 | nutritionist | pediatrician | answer | drive out | 13.051 | −0.279 |
| 8 | nutritionist | pediatrician | answer | needle | 15.193 | −0.004 |
| 7 | nutritionist | surgeon | dine with | disturb | 20.433 | 0.666 |
| 6 | nutritionist | surgeon | dine with | repulse | 21.254 | 0.771 |
| 5 | nutritionist | teacher | dine with | incriminate | 13.681 | −0.198 |
| 4 | nutritionist | teacher | dine with | misinform | 20.837 | 0.718 |
| 3 | nutritionist | technician | turn to | denounce | 16.931 | 0.218 |
| 2 | nutritionist | technician | turn to | shaft | 22.416 | 0.920 |
| 14 | pediatrician | bailiff | grin at | pooh pooh | 18.784 | 0.455 |
| 13 | pediatrician | bailiff | grin at | snub | 21.228 | 0.768 |
| 12 | pediatrician | civil engineer | acknowledge | demote | 16.484 | 0.161 |
| 11 | pediatrician | civil engineer | acknowledge | mortify | 29.391 | 1.812 |
| 10 | pediatrician | cook | acknowledge | underrate | 24.150 | 1.142 |
| 9 | pediatrician | cook | acknowledge | fail | 30.811 | 1.994 |
| 8 | pediatrician | crane operator | explain something to | shun | 24.358 | 1.168 |
| 7 | pediatrician | crane operator | explain something to | dupe | 25.564 | 1.323 |
| 6 | pediatrician | defense attorney | grin at | watch | 8.272 | −0.890 |
| 5 | pediatrician | defense attorney | grin at | order | 13.610 | −0.207 |
| 4 | pediatrician | dental hygienist | advise | bow to | 8.569 | −0.852 |
| 3 | pediatrician | dental hygienist | advise | disregard | 25.361 | 1.297 |
| 2 | pediatrician | dentist | treat | shush | 14.530 | −0.089 |
| 1 | pediatrician | dentist | treat | scare | 19.457 | 0.541 |
| 16 | pediatrician | firefighter | praise | comfort | 5.978 | −1.184 |
| 15 | pediatrician | firefighter | praise | obstruct | 18.780 | 0.455 |
| 12 | pediatrician | foreman | remember | smirk at | 12.214 | −0.386 |
| 11 | pediatrician | foreman | remember | debase | 19.361 | 0.529 |
| 10 | pediatrician | musician | treat | monitor | 9.572 | −0.724 |
| 9 | pediatrician | musician | treat | scream at | 34.396 | 2.453 |
| 8 | pediatrician | nurse | reward | idealize | 8.418 | −0.872 |
| 7 | pediatrician | nurse | reward | defy | 14.739 | −0.063 |
| 6 | pediatrician | nutritionist | raise the pay of | miss | 11.720 | −0.449 |
| 5 | pediatrician | nutritionist | raise the pay of | underrate | 23.871 | 1.106 |
| 4 | pediatrician | pediatrician | reward | evade | 17.662 | 0.311 |
| 3 | pediatrician | pediatrician | reward | ostracize | 29.571 | 1.836 |
| 2 | pediatrician | surgeon | eat with | grouse at | 17.514 | 0.293 |
| 1 | pediatrician | surgeon | eat with | nag | 27.363 | 1.553 |
| 16 | pediatrician | teacher | like | doubt | 16.538 | 0.168 |
| 15 | pediatrician | teacher | like | yell at | 24.755 | 1.219 |
| 14 | pediatrician | technician | treat | yield to | 16.701 | 0.188 |
| 13 | pediatrician | technician | treat | horrify | 25.817 | 1.355 |
| 10 | surgeon | bailiff | counsel | demoralize | 35.503 | 2.595 |
| 9 | surgeon | bailiff | counsel | frown at | 20.414 | 0.664 |
| 8 | surgeon | civil engineer | guide | spurn | 24.169 | 1.144 |
| 7 | surgeon | civil engineer | guide | manipulate | 29.640 | 1.844 |
| 6 | surgeon | cook | guide | neglect | 37.834 | 2.893 |
| 5 | surgeon | cook | guide | beg | 40.351 | 3.215 |
| 4 | surgeon | crane operator | apologize to | surprise | 7.385 | −1.004 |
| 3 | surgeon | crane operator | apologize to | idealize | 9.482 | −0.735 |
| 2 | surgeon | defense attorney | counsel | constrain | 22.147 | 0.885 |
| 1 | surgeon | defense attorney | counsel | give in to | 24.094 | 1.135 |
| 16 | surgeon | dental hygienist | guide | indoctrinate | 8.138 | −0.907 |
| 15 | surgeon | dental hygienist | guide | demean | 34.827 | 2.508 |
| 14 | surgeon | dentist | guide | badger | 33.867 | 2.385 |
| 13 | surgeon | dentist | guide | degrade | 41.578 | 3.372 |
| 12 | surgeon | firefighter | foster | upset | 29.505 | 1.827 |
| 11 | surgeon | firefighter | foster | jeer | 32.042 | 2.152 |
| 8 | surgeon | foreman | counsel | grab | 21.567 | 0.811 |
| 7 | surgeon | foreman | counsel | upstage | 22.512 | 0.932 |
| 6 | surgeon | musician | guide | need | 10.910 | −0.553 |
| 5 | surgeon | musician | guide | make fun of | 40.274 | 3.205 |
| 4 | surgeon | nurse | guard | overwork | 25.572 | 1.324 |
| 3 | surgeon | nurse | guard | insult | 36.331 | 2.701 |
| 2 | surgeon | nutritionist | guide | shout at | 26.588 | 1.454 |
| 1 | surgeon | nutritionist | guide | neglect | 37.376 | 2.834 |
| 16 | surgeon | pediatrician | foster | comply with | 7.208 | −1.026 |
| 15 | surgeon | pediatrician | foster | bind | 19.081 | 0.493 |
| 14 | surgeon | surgeon | reassure | alarm | 16.135 | 0.116 |
| 13 | surgeon | surgeon | reassure | banish | 26.814 | 1.483 |
| 12 | surgeon | teacher | accept | assess | 7.331 | −1.011 |
| 11 | surgeon | teacher | accept | avenge | 10.770 | −0.571 |
| 10 | surgeon | technician | guide | banter with | 13.275 | −0.250 |
| 9 | surgeon | technician | guide | borrow money from | 22.512 | 0.932 |
| 6 | teacher | bailiff | consider | hypnotize | 5.341 | −1.265 |
| 5 | teacher | bailiff | consider | demand | 15.703 | 0.061 |
| 4 | teacher | civil engineer | please | laugh at | 13.212 | −0.258 |
| 3 | teacher | civil engineer | please | hurt | 32.172 | 2.168 |
| 2 | teacher | cook | attend to | endure | 7.087 | −1.042 |
| 1 | teacher | cook | attend to | incite | 9.353 | −0.752 |
| 16 | teacher | crane operator | remember | rouse | 5.335 | −1.266 |
| 15 | teacher | crane operator | remember | exhaust | 11.335 | −0.498 |
| 14 | teacher | defense attorney | admire | dissuade | 5.160 | −1.288 |
| 13 | teacher | defense attorney | admire | peek at | 16.284 | 0.135 |
| 12 | teacher | dental hygienist | explain something to | someone is | 10.710 | −0.578 |
| 11 | teacher | dental hygienist | explain something to | banish | 21.142 | 0.757 |
| 10 | teacher | dentist | please | stare at | 14.504 | −0.093 |
| 9 | teacher | dentist | please | retaliate against | 15.970 | 0.095 |
| 8 | teacher | firefighter | invite | obey | 7.560 | −0.981 |
| 7 | teacher | firefighter | invite | abet | 7.864 | −0.942 |
| 4 | teacher | foreman | consider | silence | 10.445 | −0.612 |
| 3 | teacher | foreman | consider | desert | 25.962 | 1.374 |
| 2 | teacher | musician | explain something to | cross examine | 5.774 | −1.210 |
| 1 | teacher | musician | explain something to | extol | 6.168 | −1.159 |
| 16 | teacher | nurse | commend | query | 5.266 | −1.275 |
| 15 | teacher | nurse | commend | terrorize | 37.204 | 2.812 |
| 14 | teacher | nutritionist | attend to | banter with | 6.712 | −1.090 |
| 13 | teacher | nutritionist | attend to | search | 7.980 | −0.927 |
| 12 | teacher | pediatrician | invite | embarrass | 24.536 | 1.191 |
| 11 | teacher | pediatrician | invite | demoralize | 32.199 | 2.172 |
| 10 | teacher | surgeon | reply to | study | 5.731 | −1.215 |
| 9 | teacher | surgeon | reply to | jest | 11.152 | −0.522 |
| 8 | teacher | teacher | invite | punish | 12.232 | −0.383 |
| 7 | teacher | teacher | invite | restrain | 14.809 | −0.054 |
| 6 | teacher | technician | experience | refuse | 10.911 | −0.552 |
| 5 | teacher | technician | experience | bug | 22.454 | 0.925 |
| 2 | technician | bailiff | serve | impede | 11.063 | −0.533 |
| 1 | technician | bailiff | serve | plot against | 17.212 | 0.254 |
| 16 | technician | civil engineer | ask about | fine | 9.258 | −0.764 |
| 15 | technician | civil engineer | ask about | misjudge | 16.045 | 0.105 |
| 14 | technician | cook | ask about | frustrate | 14.520 | −0.091 |
| 13 | technician | cook | ask about | condemn | 20.677 | 0.697 |
| 12 | technician | crane operator | ask about | deflate | 15.636 | 0.052 |
| 11 | technician | crane operator | ask about | envy | 18.624 | 0.435 |
| 10 | technician | defense attorney | serve | dare | 6.164 | −1.160 |
| 9 | technician | defense attorney | serve | fine | 8.516 | −0.859 |
| 8 | technician | dental hygienist | ask about | misinform | 16.961 | 0.222 |
| 7 | technician | dental hygienist | ask about | bother | 18.015 | 0.357 |
| 6 | technician | dentist | ask about | chide | 7.557 | −0.982 |
| 5 | technician | dentist | ask about | discriminate against | 28.463 | 1.694 |
| 4 | technician | firefighter | chat with | leer at | 11.882 | −0.428 |
| 3 | technician | firefighter | chat with | ridicule | 24.483 | 1.184 |
| 16 | technician | foreman | serve | stall | 6.282 | −1.145 |
| 15 | technician | foreman | serve | loathe | 15.111 | −0.015 |
| 14 | technician | musician | ask about | deride | 11.786 | −0.440 |
| 13 | technician | musician | ask about | ignore | 14.730 | −0.064 |
| 12 | technician | nurse | answer | scrutinize | 12.634 | −0.332 |
| 11 | technician | nurse | answer | shout at | 15.084 | −0.018 |
| 10 | technician | nutritionist | ask about | sneer at | 16.088 | 0.110 |
| 9 | technician | nutritionist | ask about | offend | 17.547 | 0.297 |
| 8 | technician | pediatrician | chat with | disillusion | 13.483 | −0.223 |
| 7 | technician | pediatrician | chat with | repulse | 18.017 | 0.357 |
| 6 | technician | surgeon | chat with | detain | 10.530 | −0.601 |
| 5 | technician | surgeon | chat with | underrate | 15.056 | −0.022 |
| 4 | technician | teacher | ask about | teach | 6.239 | −1.150 |
| 3 | technician | teacher | ask about | envy | 20.925 | 0.729 |
| 2 | technician | technician | ask about | elude | 5.987 | −1.183 |
| 1 | technician | technician | ask about | bluff | 7.985 | −0.927 |

**Appendix D: Modeling and Robustness Checks**

In total, 16 modules of stimuli were fielded, with 32 stimuli in each module. Modules 1, 13, and 14 were re-run due to errors in one stimulus each of those three modules. In module 1, the behavior bends was included, which we decided was not appropriate for an actor-behavior-object construction. When we re-ran the module, we replaced that behavior with another close in EPA space: bluffs. In modules 13 and 14, the optimal behavior for events involving surgeon was accidentally capitalized, so we re-ran it after making the behavior lowercase. In the robustness checks, we run all three models (baseline, only distance, and distance including controls) with varying levels of the sample. In the first, we display the results from the main text: after removing individuals who failed the manipulation check, and only including respondents from the correct stimuli for modules 1, 13, and 14. In the second set of models, we include both the earlier set of respondents who answered the old set of stimuli for modules 1, 13, and 14 and those who responded to the new set of stimuli. The results are not appreciably different between the two samples.

| **Model using Analytic Sample** | | | |
| --- | --- | --- | --- |
|  | *Dependent variable:* | | |
|  |  | | |
|  | Chose Optimal Behavior | | |
|  | (1) | (2) | (3) |
|  | | | |
| Distance (Std) |  | 0.049** | 0.050** |
|  |  | (0.021) | (0.021) |
|  |  |  |  |
| Sex: Male |  |  | 0.083 |
|  |  |  | (0.086) |
|  |  |  |  |
| Education: Advanced Degree |  |  | 0.587 |
|  |  |  | (0.445) |
|  |  |  |  |
| Education: HS degree or equivalent |  |  | 0.524*** |
|  |  |  | (0.149) |
|  |  |  |  |
| Education: Master's degree |  |  | -0.172 |
|  |  |  | (0.117) |
|  |  |  |  |
| Education: Some college, no degree |  |  | 0.344** |
|  |  |  | (0.138) |
|  |  |  |  |
| Education: Vocational trade program |  |  | 0.392 |
|  |  |  | (0.427) |
|  |  |  |  |
| Age (std) |  |  | 0.358* |
|  |  |  | (0.194) |
|  |  |  |  |
| Intercept |  |  | 0.075* |
|  |  |  | (0.042) |
|  |  |  |  |
| Constant | 1.051*** | 1.052*** | 0.914*** |
|  | (0.058) | (0.057) | (0.083) |
|  |  |  |  |
|  | | | |
| Observations | 13,568 | 13,568 | 13,568 |
| Log Likelihood | -7,705.452 | -7,702.614 | -7,686.910 |
| Akaike Inf. Crit. | 15,416.900 | 15,413.230 | 15,397.820 |
| Bayesian Inf. Crit. | 15,439.450 | 15,443.290 | 15,488.010 |
|  | | | |
| *Note:* | *p<0.1; **p<0.05; ***p<0.01 | | |

|  |
| --- |
|  |

| **Model including respondents who answered to earlier versions of modules 1, 13, and 14** | | | |
| --- | --- | --- | --- |
|  | *Dependent variable:* | | |
|  |  | | |
|  | Chose Optimal Behavior | | |
|  | (1) | (2) | (3) |
|  | | | |
| Distance (Std) |  | 0.048** | 0.049*** |
|  |  | (0.019) | (0.019) |
|  |  |  |  |
| Sex: Male |  |  | 0.088 |
|  |  |  | (0.076) |
|  |  |  |  |
| Education: Advanced Degree |  |  | 0.568 |
|  |  |  | (0.437) |
|  |  |  |  |
| Education: HS degree or equivalent |  |  | 0.459*** |
|  |  |  | (0.143) |
|  |  |  |  |
| Education: Master's degree |  |  | -0.178* |
|  |  |  | (0.104) |
|  |  |  |  |
| Education: Some college, no degree |  |  | 0.236* |
|  |  |  | (0.124) |
|  |  |  |  |
| Education: Vocational trade program |  |  | 0.373 |
|  |  |  | (0.419) |
|  |  |  |  |
| Age (std) |  |  | 0.379** |
|  |  |  | (0.175) |
|  |  |  |  |
| Intercept |  |  | 0.073* |
|  |  |  | (0.038) |
|  |  |  |  |
| Constant | 1.060*** | 1.061*** | 0.944*** |
|  | (0.052) | (0.052) | (0.074) |
|  |  |  |  |
|  | | | |
| Observations | 15,936 | 15,936 | 15,936 |
| Log Likelihood | -9,055.880 | -9,052.599 | -9,037.398 |
| Akaike Inf. Crit. | 18,117.760 | 18,113.200 | 18,098.800 |
| Bayesian Inf. Crit. | 18,140.790 | 18,143.900 | 18,190.910 |
|  | | | |
| *Note:* | *p<0.1; **p<0.05; ***p<0.01 | | |

|  |
| --- |
|  |
